# Supplementary material for: Effectiveness of primary care psychological therapy services for the treatment of depression and anxiety in people living with dementia: Evidence from national healthcare records in England
Source: PubMed Central journal article supplement (PMC9596302; doi:10.1016/j.eclinm.2022.101692), 2022-10-14
Supplement: mmc1.pdf [file mmc1.pdf]

## Supplementary Materials

### Table of contents

|                                                                                               |    |
|-----------------------------------------------------------------------------------------------|----|
| A) MODIFY Study dataset .....                                                                 | 2  |
| B) Thresholds for Anxiety disorder specific disorders (ADSM).....                             | 3  |
| C) Proportion of PLWD in IAPT .....                                                           | 4  |
| D) Propensity score matching model .....                                                      | 5  |
| E) Clinical commissioning group categories .....                                              | 6  |
| F) Comparison of participants with complete and missing data.....                             | 8  |
| G) Contextualising change in therapy outcomes in PLWD with previously published studies.....  | 9  |
| H) Multilevel models .....                                                                    | 10 |
| I) Comparison of outcomes between age of dementia diagnosis groups (65+ vs >65 years).....    | 11 |
| J) Sensitivity analyses: Primary and secondary outcomes for PLWD<65 and matched controls .... | 12 |
| K) Sensitivity analyses: Primary and secondary outcomes for PLWD65+ and matched controls .... | 13 |
| L) Sensitivity analyses: Treatment intensity.....                                             | 14 |
| References .....                                                                              | 15 |

## A) MODIFY Study dataset

|                                                |                                                                                                                                                                                                                                                                                                                                                                                           |
|------------------------------------------------|-------------------------------------------------------------------------------------------------------------------------------------------------------------------------------------------------------------------------------------------------------------------------------------------------------------------------------------------------------------------------------------------|
| <b>IAPT dataset (1)</b>                        | Routinely collected data for every patient seen in IAPT services across all 211 clinical commissioning group areas in England between 2012 to 2019. Includes demographic (e.g., gender, age, ethnicity), therapy (e.g., referral and assessment dates, treatment information at each appointment) and outcome (improvement, recovery, deterioration) information for individual patients. |
| <b>Hospital Episode Statistics dataset (2)</b> | Admitted Patient Care and Outpatient datasets from all National Health Service (NHS) hospitals across England. Includes demographic (e.g., age, ethnicity, gender), geographical (e.g., residential area, area treatment received), administrative (e.g., dates of admission and discharge), and clinical (e.g., diagnoses, treatments, operations) information for individual patients.  |
| <b>Mental Health Services dataset (3)</b>      | Previously known as the Mental Health Minimum Dataset (MHMDs) and the Mental Health and Learning Disability Dataset (MHLDDS). Includes data from secondary care services (e.g., provided in hospitals, outpatient clinics, in the community) for mental illness, learning disability, autism, and other neurodevelopmental conditions.                                                    |
| <b>HES-ONS Mortality dataset (4)</b>           | Linked information from HES and Office of National Statistics (ONS) mortality data. Includes cause, date, and place of death (both in and out of hospital).                                                                                                                                                                                                                               |

**B) Thresholds for Anxiety disorder specific disorders (ADSM)**

| <b>ADSM (5)</b>                 | <b>Caseness</b> | <b>Change (improvement/deterioration)</b> |
|---------------------------------|-----------------|-------------------------------------------|
| Agoraphobia Morbidity Inventory | >2.3            | 0.73                                      |
| Social Phobia Inventory         | 19              | 10                                        |
| Panic Disorder Severity Scale   | 8               | >5                                        |
| Impact of Events Scale (PTSD)   | 33              | 9                                         |
| Obsessive Compulsive Inventory  | 40              | 32                                        |
| Health Anxiety Inventory        | 18              | 4                                         |

### **C) Proportion of PLWD in IAPT**

In our study, PLWD made up 0.08% of the full sample and 0.74% of participants aged 65 and over. To calculate representativeness, we compared the difference in the observed proportion of PLWD aged 65+ who had treatment in IAPT and the expected proportion of PLWD aged 65+ who may be eligible for such therapy. The lower bound estimate of expected access (1.14%) was calculated using national dementia prevalence estimates for mild to moderate dementia (3%) (6) and the prevalence estimates of depression and anxiety in mild to moderate dementia (38%) (7). Given the higher level of anxiety and depression in PLWD, this is likely to be an underestimate. To calculate the upper bound estimate of expected access (6.69%), we also accounted for depression prevalence in a general older population (17%) (8). This may suggest that the number of PLWD aged 65+ in IAPT is between 1.5 and 9 times lower than the expected need for therapy in these services.

Note, this estimate assumes that all people living with mild-moderate dementia are suitable for psychological therapies offered in IAPT (e.g., cognitive behavioural therapy) and that undiagnosed dementia is not present in the control sample. Moreover, the observed proportion of PLWD in our sample is likely not that much lower than what would be expected in practice when also considering IAPT access targets (15-25% of prevalent cases (1, 9)) and the lower access rates of older adults generally in IAPT (6.4% in 2015 when the target is 12% (10, 11)).

#### D) Propensity score matching model

|                         |                       | Coefficient | se   | 95% CI      | p     |
|-------------------------|-----------------------|-------------|------|-------------|-------|
| Gender                  | Female                | -.33        | .06  | -.44, -.22  | <.001 |
|                         | Missing               | -1.20       | .59  | -2.35, -.05 | .04   |
| Ethnicity               | Mixed                 | .43         | .26  | -.09, .94   | .10   |
|                         | Asian                 | .53         | .14  | .26, .81    | <.001 |
|                         | Black                 | .64         | .16  | .33, .96    | <.001 |
|                         | Other                 | .67         | .23  | .22, 1.11   | .004  |
|                         | Missing               | .20         | .10  | -.01, .39   | .04   |
| IMD decile              | 2                     | -.28        | .11  | -.49, -.06  | .01   |
|                         | 3                     | -.27        | .11  | -.48, -.06  | .01   |
|                         | 4                     | -.51        | .12  | -.74, -.28  | <.001 |
|                         | 5                     | -.41        | .11  | -.63, -.19  | <.001 |
|                         | 6                     | -.40        | .11  | -.62, -.18  | <.001 |
|                         | 7                     | -.65        | .12  | -.88, -.41  | <.001 |
|                         | 8                     | -.61        | .12  | -.84, -.37  | <.001 |
|                         | 9                     | -.76        | .13  | -1.01, -.51 | <.001 |
|                         | 10                    | -.79        | .13  | -1.04, -.53 | <.001 |
|                         | Missing               | -.28        | .18  | -.63, .07   | .12   |
| LTC case                | Yes                   | .61         | .07  | .48, .74    | <.001 |
|                         | Missing               | .41         | .08  | .24, .57    | <.001 |
| Appointment year        | 2013                  | .10         | .29  | -.46, .66   | .73   |
|                         | 2014                  | .50         | .27  | -.03, 1.04  | .07   |
|                         | 2015                  | .85         | .27  | .32, 1.37   | .002  |
|                         | 2016                  | 1.05        | .27  | .53, 1.57   | <.001 |
|                         | 2017                  | 1.05        | .27  | .53, 1.57   | <.001 |
|                         | 2018                  | 1.07        | .27  | .55, 1.59   | <.001 |
|                         | 2019                  | 1.15        | .29  | .59, 1.72   | <.001 |
| Psychotropic medication | Prescribed and taking | .47         | .17  | .14, .80    | .01   |
|                         | Not prescribed        | .18         | .17  | -.16, .52   | .29   |
|                         | Missing               | .74         | .18  | .37, 1.10   | <.001 |
| Employment status       | Unemployed            | .85         | .07  | .71, .99    | <.001 |
|                         | Missing               | .38         | .12  | .14, .61    | .002  |
| Age at referral         |                       | .12         | .002 | .11, .12    | <.001 |
| Baseline PHQ-9          |                       | .02         | .01  | .01, .04    | <.001 |
| Baseline GAD-7          |                       | -.04        | .01  | -.05, -.03  | <.001 |
| Waiting time 1          |                       | .02         | .01  | .003, .03   | .02   |
| Waiting time 2          |                       | .01         | .003 | .0001, .01  | .05   |

## E) Clinical commissioning group categories

|    | Category                                         | Clinical commissioning groups (CCG)                                                                                                                                                                                                                                                                                                                                                                                                                                                                                                                                                                                                                                                                       |
|----|--------------------------------------------------|-----------------------------------------------------------------------------------------------------------------------------------------------------------------------------------------------------------------------------------------------------------------------------------------------------------------------------------------------------------------------------------------------------------------------------------------------------------------------------------------------------------------------------------------------------------------------------------------------------------------------------------------------------------------------------------------------------------|
| 1  | NHS England South (South West)                   | NHS Bristol CCG , NHS Kernow CCG, NHS North Somerset CCG, NHS Somerset CCG, NHS South Gloucestershire CCG, NHS Northern, Eastern and Western Devon CCG, NHS South Devon and Torbay CCG                                                                                                                                                                                                                                                                                                                                                                                                                                                                                                                    |
| 2  | NHS England South (South East)                   | NHS Ashford CCG, NHS Brighton and Hove CCG, NHS Canterbury and Coastal CCG, NHS Eastbourne, Hailsham and Seaford CCG, NHS Coastal West Sussex CCG, NHS Crawley CCG, NHS Dartford, Gravesham and Swanley CCG, NHS East Surrey CCG, NHS Guildford and Waverley CCG, NHS Hastings & Rother CCG, NHS Medway CCG, NHS Horsham and Mid Sussex CCG, NHS North West Surrey CCG, NHS South Kent Coast CCG, NHS Surrey Heath CCG, NHS Swale CCG, NHS Thanet CCG, NHS Surrey Downs CCG, NHS West Kent CCG, NHS High Weald Lewes Havens CCG                                                                                                                                                                           |
| 3  | NHS England South (South Central)                | NHS Bracknell and Ascot CCG, NHS Chiltern CCG, NHS Newbury and District CCG, NHS North & West Reading CCG, NHS Oxfordshire CCG, NHS Slough CCG, NHS South Reading CCG, NHS Aylesbury Vale CCG, NHS Windsor, Ascot and Maidenhead CCG, NHS Wokingham CCG, NHS Bath and North East Somerset CCG, NHS Gloucestershire CCG, NHS Swindon CCG, NHS Wiltshire CCG                                                                                                                                                                                                                                                                                                                                                |
| 4  | NHS England South (Wessex)                       | NHS North Hampshire CCG, NHS Fareham and Gosport CCG, NHS Isle of Wight CCG, NHS Portsmouth CCG, NHS South Eastern Hampshire CCG, NHS Southampton CCG, NHS West Hampshire CCG, NHS Dorset CCG, NHS North East Hampshire and Farnham CCG                                                                                                                                                                                                                                                                                                                                                                                                                                                                   |
| 5  | NHS England London                               | NHS Barking and Dagenham CCG, NHS Barnet CCG, NHS Bexley CCG, NHS Brent CCG, NHS Bromley CCG, NHS Camden CCG, NHS City and Hackney CCG, NHS Croydon CCG, NHS Ealing CCG, NHS Enfield CCG, NHS Hounslow CCG, NHS Greenwich CCG, NHS Hammersmith and Fulham CCG, NHS Haringey CCG, NHS Harrow CCG, NHS Havering CCG, NHS Hillingdon CCG, NHS Islington CCG, NHS Kingston CCG, NHS Lambeth CCG, NHS Lewisham CCG, NHS Newham CCG, NHS Redbridge CCG, NHS Richmond CCG, NHS Southwark CCG, NHS Merton CCG, NHS Sutton CCG, NHS Tower Hamlets CCG, NHS Waltham Forest CCG, NHS Wandsworth CCG, NHS West London (Kensington and Chelsea, Queen's Park and Paddington) CCG, NHS Central London (Westminster) CCG |
| 6  | NHS England Midlands and East (West Midlands)    | NHS Birmingham South and Central CCG, NHS Coventry and Rugby CCG, NHS Dudley CCG, NHS Herefordshire CCG, NHS Warwickshire North CCG, NHS Redditch and Bromsgrove CCG, NHS Sandwell and West Birmingham CCG, NHS Solihull CCG, NHS South Warwickshire CCG, NHS South Worcestershire CCG, NHS Walsall CCG, NHS Wolverhampton CCG, NHS Wyre Forest CCG, NHS Birmingham Crosscity CCG                                                                                                                                                                                                                                                                                                                         |
| 7  | NHS England Midlands and East (North Midlands)   | NHS Erewash CCG, NHS Hardwick CCG, NHS Mansfield and Ashfield CCG, NHS Newark & Sherwood CCG, NHS North Derbyshire CCG, NHS Nottingham City CCG, NHS Nottingham North and East CCG, NHS Nottingham West CCG, NHS Rushcliffe CCG, NHS Southern Derbyshire CCG, NHS Cannock Chase CCG, NHS East Staffordshire CCG, NHS North Staffordshire CCG, NHS Shropshire CCG, NHS South East Staffordshire and Seisdon Peninsula CCG, NHS Stafford and Surrounds CCG, NHS Stoke on Trent CCG, NHS Telford and Wrekin CCG                                                                                                                                                                                              |
| 8  | NHS England Midlands and East (East)             | NHS Cambridgeshire and Peterborough CCG, NHS Ipswich and East Suffolk CCG, NHS Great Yarmouth & Waveney CCG, NHS Mid Essex CCG, NHS North East Essex CCG, NHS North Norfolk CCG, NHS Norwich CCG, NHS South Norfolk CCG, NHS Thurrock CCG, NHS West Essex CCG, NHS West Norfolk CCG, NHS West Suffolk CCG, NHS Basildon and Brentwood CCG, NHS Castle Point and Rochford CCG, NHS Southend CCG                                                                                                                                                                                                                                                                                                            |
| 9  | NHS England Midlands and East (Central Midlands) | NHS Lincolnshire East CCG, NHS Corby CCG, NHS East Leicestershire and Rutland CCG, NHS Leicester City CCG, NHS Lincolnshire West CCG, NHS Milton Keynes CCG, NHS Nene CCG, NHS South West Lincolnshire CCG, NHS West Leicestershire CCG, NHS Bedfordshire CCG, NHS East and North Hertfordshire CCG, NHS Herts Valleys CCG, NHS Luton CCG, NHS South Lincolnshire CCG                                                                                                                                                                                                                                                                                                                                     |
| 10 | NHS England North (Lancashire and South Cumbria) | NHS Blackburn with Darwen CCG, NHS Blackpool CCG, NHS Chorley and South Ribble CCG, NHS East Lancashire CCG, NHS Greater Preston CCG, NHS Lancashire North CCG, NHS West Lancashire CCG, NHS Fylde & Wyre CCG                                                                                                                                                                                                                                                                                                                                                                                                                                                                                             |
| 11 | NHS England North (Cumbria and North East)       | NHS Darlington CCG, NHS Durham Dales, Easington and Sedgefield CCG, NHS Gateshead CCG, NHS Newcastle North and East CCG, NHS Newcastle West CCG, NHS North Durham CCG, NHS Hartlepool and Stockton-on-Tees CCG, NHS Northumberland CCG, NHS South Tees CCG, NHS South Tyneside CCG, NHS Sunderland CCG, NHS Cumbria CCG, NHS North Tyneside CCG                                                                                                                                                                                                                                                                                                                                                           |
| 12 | NHS England North (Greater Manchester)           | NHS Bolton CCG, NHS Bury CCG, NHS Central Manchester CCG, NHS Oldham CCG, NHS Heywood, Middleton & Rochdale CCG, NHS Salford CCG, NHS North Manchester CCG, NHS South Manchester CCG, NHS Stockport CCG, NHS Tameside and Glossop CCG, NHS Trafford CCG, NHS Wigan Borough CCG                                                                                                                                                                                                                                                                                                                                                                                                                            |

|    |                                             |                                                                                                                                                                                                                                                                                                                                                                                                                                                                                                                                                                                                                     |
|----|---------------------------------------------|---------------------------------------------------------------------------------------------------------------------------------------------------------------------------------------------------------------------------------------------------------------------------------------------------------------------------------------------------------------------------------------------------------------------------------------------------------------------------------------------------------------------------------------------------------------------------------------------------------------------|
| 13 | NHS England North (Yorkshire and Humber)    | NHS Airedale, Wharfedale and Craven CCG, NHS Barnsley CCG, NHS Bassetlaw CCG, NHS Bradford Districts CCG, NHS Calderdale CCG, NHS Leeds North CCG, NHS Bradford City CCG, NHS Doncaster CCG, NHS East Riding of Yorkshire CCG, NHS Greater Huddersfield CCG, NHS Leeds West CCG, NHS Hambleton, Richmondshire and Whitby CCG, NHS Harrogate and Rural District CCG, NHS Hull CCG, NHS Leeds South and East CCG, NHS North East Lincolnshire CCG, NHS North Kirklees CCG, NHS North Lincolnshire CCG, NHS Rotherham CCG, NHS Scarborough and Ryedale CCG, NHS Sheffield CCG, NHS Vale of York CCG, NHS Wakefield CCG |
| 14 | NHS England North (Cheshire and Merseyside) | NHS Eastern Cheshire CCG, NHS Halton CCG, NHS Knowsley CCG, NHS South Cheshire CCG, NHS South Sefton CCG, NHS Southport and Formby CCG, NHS St Helens CCG, NHS Vale Royal CCG, NHS Warrington CCG, NHS West Cheshire CCG, NHS Wirral CCG, NHS Liverpool CCG                                                                                                                                                                                                                                                                                                                                                         |

**F) Comparison of participants with complete and missing data**

|                         |                         | Dementia group (N = 1,549) |                           |          | Control group (N = 1,943,774)    |                               |          |
|-------------------------|-------------------------|----------------------------|---------------------------|----------|----------------------------------|-------------------------------|----------|
|                         |                         | Complete data<br>(N = 885) | Missing data<br>(N = 664) |          | Complete data<br>(N = 1,212,484) | Missing data<br>(N = 731,290) |          |
|                         |                         | N (%)                      | N (%)                     | p        | N (%)                            | N (%)                         | p        |
| Gender                  | Male                    | 389 (43.95)                | 267 (40.21)               | .17      | 396,726 (32.72)                  | 242,101 (33.11)               | <.001    |
|                         | Female                  | 496 (56.05)                | 393 (59.19)               |          | 815,758 (67.28)                  | 482,386 (65.96)               |          |
| Ethnicity               | White                   | 796 (89.94)                | 435 (65.51)               | .01      | 1,088,587 (89.78)                | 504,403 (68.97)               | <.001    |
|                         | Mixed                   | 7 (0.79)                   | 9 (1.36)                  |          | 25,123 (2.07)                    | 12,458 (1.70)                 |          |
|                         | Asian                   | 42 (4.75)                  | 27 (4.07)                 |          | 53,032 (4.37)                    | 29,860 (4.08)                 |          |
|                         | Black                   | 24 (2.71)                  | 31 (4.67)                 |          | 32,441 (2.68)                    | 15,680 (2.14)                 |          |
|                         | Other                   | 16 (1.81)                  | 6 (0.90)                  |          | 13,301 (1.10)                    | 7,657 (1.05)                  |          |
| IMD decile              | 1                       | 102 (11.53)                | 129 (19.43)               | <.001    | 121,014 (9.98)                   | 87,648 (11.99)                | <.001    |
|                         | 2                       | 89 (10.06)                 | 94 (14.16)                |          | 131,516 (10.85)                  | 78,292 (10.71)                |          |
|                         | 3                       | 117 (13.22)                | 67 (10.09)                |          | 134,056 (11.06)                  | 74,658 (10.21)                |          |
|                         | 4                       | 87 (9.83)                  | 67 (10.09)                |          | 135,077 (11.14)                  | 70,330 (9.62)                 |          |
|                         | 5                       | 101 (11.41)                | 52 (7.83)                 |          | 126,497 (10.43)                  | 67,308 (9.20)                 |          |
|                         | 6                       | 93 (10.51)                 | 59 (8.89)                 |          | 121,828 (10.05)                  | 63,832 (8.73)                 |          |
|                         | 7                       | 73 (8.25)                  | 51 (7.68)                 |          | 117,078 (9.66)                   | 60,114 (8.22)                 |          |
|                         | 8                       | 81 (9.15)                  | 39 (5.87)                 |          | 113,107 (9.33)                   | 58,540 (8.01)                 |          |
|                         | 9                       | 74 (8.36)                  | 30 (4.52)                 |          | 110,020 (9.07)                   | 55,011 (7.52)                 |          |
|                         | 10                      | 68 (7.68)                  | 27 (4.07)                 |          | 102,291 (8.44)                   | 51,349 (7.02)                 |          |
| LTC case                | No                      | 299 (33.79)                | 94 (14.60)                | .98      | 856,692 (70.66)                  | 230,955 (31.58)               | <.001    |
|                         | Yes                     | 586 (66.21)                | 185 (27.86)               |          | 355,792 (29.34)                  | 90,976 (12.44)                |          |
| Appointment year        | 2012                    | 11 (1.24)                  | 8 (1.20)                  | <.001    | 24,269 (2.00)                    | 36,118 (4.94)                 | <.001    |
|                         | 2013                    | 32 (3.62)                  | 43 (6.48)                 |          | 107,508 (8.87)                   | 110,975 (15.18)               |          |
|                         | 2014                    | 68 (7.68)                  | 95 (14.31)                |          | 150,087 (12.38)                  | 140,582 (19.22)               |          |
|                         | 2015                    | 130 (14.69)                | 148 (22.29)               |          | 196,629 (16.22)                  | 139,794 (19.12)               |          |
|                         | 2016                    | 170 (19.21)                | 145 (21.84)               |          | 226,149 (18.65)                  | 112,028 (15.32)               |          |
|                         | 2017                    | 192 (21.69)                | 118 (17.77)               |          | 227,165 (18.74)                  | 92,235 (12.61)                |          |
|                         | 2018                    | 224 (25.31)                | 93 (14.01)                |          | 231,212 (19.07)                  | 82,875 (11.33)                |          |
|                         | 2019                    | 58 (6.55)                  | 14 (2.11)                 |          | 49,465 (4.08)                    | 16,683 (2.28)                 |          |
| Psychotropic medication | Prescribed – not taking | 25 (2.82)                  | 14 (2.11)                 | .03      | 61,822 (5.10)                    | 30,581 (4.18)                 | <.001    |
|                         | Prescribed and taking   | 587 (66.33)                | 239 (35.99)               |          | 622,014 (51.30)                  | 294,794 (40.31)               |          |
|                         | Not prescribed          | 273 (30.85)                | 154 (23.19)               |          | 528,648 (43.60)                  | 227,216 (31.07)               |          |
| Employment status       | Employed                | 644 (72.77)                | 241 (36.30)               | .35      | 959,793 (79.16)                  | 463,838 (63.43)               | <.001    |
|                         | Unemployed              | 372 (42.03)                | 156 (23.49)               |          | 252,691 (20.84)                  | 151,980 (20.78)               |          |
|                         |                         | <b>Mean (SD)</b>           | <b>Mean (SD)</b>          | <b>p</b> | <b>Mean (SD)</b>                 | <b>Mean (SD)</b>              | <b>p</b> |
| Age at referral         |                         | 64.46 (15.76)              | 67.85 (16.57)             | <.001    | 40.21 (14.76)                    | 40.48 (14.62)                 | <.001    |
| Baseline PHQ-9          |                         | 16.15 (5.85)               | 14.78 (5.60)              | <.001    | 15.67 (5.60)                     | 15.81 (5.65)                  | <.001    |
| Baseline GAD-7          |                         | 13.46 (5.04)               | 12.31 (5.13)              | <.001    | 14.29 (4.42)                     | 14.27 (4.50)                  | <.001    |
| Waiting time 1          |                         | 3.07 (3.66)                | 3.51 (4.83)               | .04      | 2.86 (3.65)                      | 3.85 (5.10)                   | <.001    |
| Waiting time 2          |                         | 7.82 (7.46)                | 5.22 (6.85)               | <.001    | 6.86 (7.01)                      | 6.29 (7.30)                   | <.001    |
| Number of sessions      |                         | 6.18 (4.10)                | 4.67 (3.66)               | <.001    | 6.84 (4.65)                      | 5.95 (4.37)                   | <.001    |

Independent t-tests were used for continuous outcomes and chi-square tests were used for categorical outcomes



**G) Contextualising change in therapy outcomes in PLWD with previously published studies**

| <b>Study (12)</b>      | <b>Group</b>          | <b>Depression measure</b> | <b>d</b> | <b>95% CI</b> | <b>Follow up</b> |
|------------------------|-----------------------|---------------------------|----------|---------------|------------------|
| <b>MODIFY</b>          | IAPT                  | PHQ9                      | -0.83    | --.90, -.75   |                  |
| <b>Stanley (2013)</b>  | Control               | GDS                       | -0.23    | --.94, .47    | 3 months         |
|                        | Peaceful Mind Program |                           | -0.24    | -1.01, .53    |                  |
| <b>Guetin (2009)</b>   | Control               | GDS                       | 0.04     | --.67, .76    | 4 weeks          |
|                        | Music therapy         |                           | -0.59    | -1.32, .15    |                  |
| <b>Cheng (2012)</b>    | Control               | GDS                       | 0.04     | --.76, .84    | 3 months         |
|                        | Tai Chi               |                           | -0.60    | -1.42, .22    |                  |
| <b>Bailey (2016)</b>   | Control               | GDS                       | -0.23    | --.78, .33    | 6 weeks          |
|                        | QAR-Depression        |                           | -0.56    | -1.12, -.01   |                  |
| <b>Williams (2008)</b> | Control               | CSDD                      | -0.40    | -1.21, .41    | 16 weeks         |
|                        | Exercise training     |                           | -0.43    | -1.13, .27    |                  |
| <b>Study</b>           | <b>Group</b>          | <b>Anxiety measure</b>    | <b>D</b> | <b>95% CI</b> | <b>Follow up</b> |
| <b>MODIFY</b>          | IAPT                  | GAD7                      | -0.80    | --.87, -.72   |                  |
| <b>Stanley (2013)</b>  | Control               | GAI                       | -0.26    | --.97, .44    | 3 months         |
|                        | Peaceful Mind Program |                           | -0.13    | --.90, .64    |                  |
| <b>Guetin (2009)</b>   | Control               | Hamilton Scale            | -0.08    | --.79, .64    | 4 weeks          |
|                        | Music therapy         |                           | -1.42    | -2.22, -.62   |                  |

## H) Multilevel models

| PRIMARY                 | Reliable improvement |     |          |       |      | Reliable recovery |     |          |       |      | Deterioration     |      |            |      |       |
|-------------------------|----------------------|-----|----------|-------|------|-------------------|-----|----------|-------|------|-------------------|------|------------|------|-------|
|                         | N                    | OR  | 95% CI   | p     | ICC  | N                 | OR  | 95% CI   | p     | ICC  | N                 | OR   | 95% CI     | p    | ICC   |
| PS matched (unadjusted) | 2,539                | .77 | .65, .91 | .002  | .008 | 2,246             | .73 | .62, .86 | <.001 | .002 | 2,534             | 1.38 | 1.04, 1.83 | .02  | .004  |
| PS matched (adjusted)   | 2,539                | .81 | .68, .97 | .02   | .01  | 2,242             | .78 | .65, .93 | .01   | .005 | 2,529             | 1.38 | 1.03, 1.85 | .03  | .002  |
| SECONDARY               | PHQ-9 Change         |     |          |       |      | GAD-7 Change      |     |          |       |      | WSAS total Change |      |            |      |       |
|                         | N                    | b   | se       | P     | ICC  | N                 | b   | se       | p     | ICC  | N                 | B    | se         | p    | ICC   |
| PS matched (unadjusted) | 2,544                | -   | .27      | <.001 | .004 | 2,544             | -   | .24      | <.001 | .004 | 1,945             | -    | .43        | .001 | <.001 |
| PS matched (adjusted)   | 2,544                | -   | .24      | <.001 | .005 | 2,544             | -   | .20      | .004  | .007 | 1,945             | -    | .43        | .002 | <.001 |

**I) Comparison of outcomes between age of dementia diagnosis groups (65+ vs >65 years)**

|                             | Diagnosis 65+  |               | Diagnosis <65  |               | p        |
|-----------------------------|----------------|---------------|----------------|---------------|----------|
|                             | Total N        | N (%)         | Total N        | N (%)         |          |
| <b>Primary outcomes</b>     |                |               |                |               |          |
| <b>Reliable improvement</b> | 864            | 554 (64.12%)  | 680            | 397 (58.38%)  | .021     |
| <b>Reliable recovery</b>    | 744            | 341 (45.83%)  | 631            | 195 (30.90%)  | <.001    |
| <b>Deterioration</b>        | 864            | 76 (8.80%)    | 679            | 77 (11.34%)   | .097     |
| <b>Secondary outcomes</b>   | <b>Total N</b> | <b>M (SD)</b> | <b>Total N</b> | <b>M (SD)</b> | <b>p</b> |
| <b>PHQ-9 Change</b>         | 865            | 5.37 (6.24)   | 684            | 5.07 (4.54)   | .375     |
| <b>GAD-7 Change</b>         | 865            | 4.43 (5.45)   | 684            | 4.33 (6.00)   | .743     |
| <b>WSAS Change</b>          | 573            | 3.41 (8.32)   | 540            | 4.41 (10.83)  | .081     |

Independent t-tests were used for continuous outcomes and chi-square tests were used for categorical outcomes

**J) Sensitivity analyses: Primary and secondary outcomes for PLWD<65 and matched controls**

| Primary outcomes               | Reliable improvement |       |          |      | Reliable recovery |      |          |      | Reliable Deterioration |       |           |      |
|--------------------------------|----------------------|-------|----------|------|-------------------|------|----------|------|------------------------|-------|-----------|------|
|                                | N                    | OR    | 95% CI   | p    | N                 | OR   | 95% CI   | p    | N                      | OR    | 95% CI    | p    |
| <b>PS matched (unadjusted)</b> | 1,216                | .75   | .59, .95 | .016 | 1,126             | .73  | .58, .94 | .013 | 1,210                  | 1.27  | .86, 1.87 | .224 |
| <b>PS matched (adjusted)*</b>  | 1,216                | .75   | .58, .96 | .023 | 1,126             | .74  | .57, .96 | .023 | 1,210                  | 1.31  | .87, 1.99 | .196 |
| Secondary outcomes             | PHQ-9 Change         |       |          |      | GAD-7 Change      |      |          |      | WSAS Change            |       |           |      |
|                                | N                    | B     | se       | p    | N                 | B    | se       | p    | N                      | B     | se        | p    |
| <b>PS matched (unadjusted)</b> | 1,222                | -1.09 | .39      | .006 | 1,222             | -.77 | .35      | .027 | 965                    | -1.11 | .71       | .117 |
| <b>PS matched (adjusted)*</b>  | 1,222                | -1.09 | .36      | .003 | 1,222             | -.69 | .31      | .026 | 965                    | -1.19 | .71       | .094 |

Logistic regression models were used for primary outcomes and linear regression models were used for secondary outcomes

All 611 PLWD<65 with complete data on matched variables were able to be matched

\* Adjusted for all matched variables (gender, ethnicity, employment status, LTC case, psychotropic medication, IMD decile, year of first appointment, age at referral, baseline PHQ-9, baseline GAD-7, waiting times referral to assessment, waiting time assessment to treatment) and number of IAPT sessions attended

**K) Sensitivity analyses: Primary and secondary outcomes for PLWD65+ and matched controls**

| Primary outcomes               | Reliable improvement |       |          |       | Reliable recovery |       |          |       | Reliable Deterioration |       |            |      |
|--------------------------------|----------------------|-------|----------|-------|-------------------|-------|----------|-------|------------------------|-------|------------|------|
|                                | N                    | OR    | 95% CI   | p     | N                 | OR    | 95% CI   | p     | N                      | OR    | 95% CI     | p    |
| <b>PS matched (unadjusted)</b> | 1,469                | .63   | .50, .79 | <.001 | 1,236             | .68   | .54, .85 | .001  | 1,466                  | 1.78  | 1.18, 2.68 | .006 |
| <b>PS matched (adjusted)*</b>  | 1,469                | .63   | .50, .80 | <.001 | 1,228             | .69   | .54, .87 | .002  | 1,449                  | 1.92  | 1.25, 2.96 | .003 |
| Secondary outcomes             | PHQ-9 Change         |       |          |       | GAD-7 Change      |       |          |       | WSAS Change            |       |            |      |
|                                | N                    | B     | se       | p     | N                 | B     | se       | p     | N                      | B     | se         | p    |
| <b>PS matched (unadjusted)</b> | 1,472                | -1.44 | .34      | <.001 | 1,472             | -1.29 | .29      | <.001 | 1,057                  | -.91  | .51        | .077 |
| <b>PS matched (adjusted)*</b>  | 1,472                | -1.52 | .29      | <.001 | 1,472             | -1.01 | .25      | <.001 | 1,057                  | -1.04 | .52        | .047 |

Logistic regression models were used for primary outcomes and linear regression models were used for secondary outcomes

Of the 757 PLWD diagnosed 65+ with complete data on matched variables, 21 were unable to be matched

\* Adjusted for all matched variables (gender, ethnicity, employment status, LTC case, psychotropic medication, IMD decile, year of first appointment, age at referral, baseline PHQ-9, baseline GAD-7, waiting times referral to assessment, waiting time assessment to treatment) and number of IAPT sessions attended

**L) Sensitivity analyses: Treatment intensity**

| Primary outcomes                 | Reliable improvement |       |           |       | Reliable recovery |       |           |      | Reliable Deterioration |       |            |      |
|----------------------------------|----------------------|-------|-----------|-------|-------------------|-------|-----------|------|------------------------|-------|------------|------|
|                                  | N                    | OR    | 95% CI    | p     | N                 | OR    | 95% CI    | p    | N                      | OR    | 95% CI     | p    |
| Low intensity only (unadjusted)  | 766                  | ·62   | ·45, ·84  | ·002  | 638               | ·66   | ·49, ·91  | ·010 | 765                    | 2·02  | 1·17, 3·49 | ·012 |
| High intensity only (unadjusted) | 998                  | ·70   | ·53, ·91  | ·009  | 916               | ·64   | ·49, ·83  | ·001 | 997                    | 1·17  | ·74, 1·87  | ·497 |
| Mixed intensity (unadjusted)     | 285                  | ·73   | ·44, 1·22 | ·229  | 260               | ·81   | ·50, 1·31 | ·385 | 284                    | 1·62  | ·68, 3·87  | ·280 |
| Low intensity only (adjusted)*   | 766                  | ·60   | ·43, ·84  | ·003  | 638               | ·67   | ·47, ·94  | ·022 | 760                    | 2·17  | 1·20, 3·95 | ·011 |
| High intensity only (adjusted)*  | 992                  | ·68   | ·51, ·91  | ·010  | 916               | ·63   | ·47, ·83  | ·001 | 977                    | 1·31  | ·79, 2·19  | ·298 |
| Mixed intensity (adjusted)*      | 283                  | ·74   | ·41, 1·36 | ·338  | 259               | ·86   | ·50, 1·48 | ·575 | 246                    | 1·61  | ·57, 4·54  | ·369 |
| Secondary outcomes               | PHQ-9 Change         |       |           |       | GAD-7 Change      |       |           |      | WSAS Change            |       |            |      |
|                                  | N                    | b     | se        | p     | N                 | b     | se        | p    | N                      | b     | se         | p    |
| Low intensity only (unadjusted)  | 768                  | -1·28 | ·46       | ·006  | 768               | ·96   | ·42       | ·021 | 679                    | -1·18 | ·72        | ·102 |
| High intensity only (unadjusted) | 1,000                | -1·53 | ·43       | <·001 | 1,000             | -1·16 | ·37       | ·002 | 864                    | -1·72 | ·66        | ·010 |
| Mixed intensity (unadjusted)     | 286                  | -1·53 | ·84       | ·070  | 286               | ·13   | ·71       | ·852 | 267                    | ·87   | 1·28       | ·496 |
| Low intensity only (adjusted)*   | 768                  | -1·49 | ·41       | <·001 | 768               | ·88   | ·35       | ·013 | 679                    | -1·07 | ·71        | ·131 |
| High intensity only (adjusted)*  | 1,000                | -1·59 | ·39       | <·001 | 1,000             | -1·06 | ·33       | ·001 | 864                    | -1·74 | ·67        | ·009 |
| Mixed intensity (adjusted)*      | 286                  | ·98   | ·75       | ·195  | 286               | ·03   | ·63       | ·957 | 267                    | -1·58 | 1·24       | ·205 |

Logistic regression models were used for primary outcomes and linear regression models were used for secondary outcomes

PS matched samples were used for all analyses

\* Adjusted for all matched variables (gender, ethnicity, employment status, LTC case, psychotropic medication, IMD decile, year of first appointment, age at referral, baseline PHQ-9, baseline GAD-7, waiting time referral to assessment, waiting time assessment to treatment) and number of IAPT sessions attended

## References

1. National Collaborating Centre for Mental Health. The Improving Access to Psychological Therapies Manual 2021 [Available from: <https://www.england.nhs.uk/wp-content/uploads/2018/06/the-iapt-manual-v5.pdf>].
2. NHS Digital. Hospital Episode Statistics (HES) 2021 [Available from: <https://digital.nhs.uk/data-and-information/data-tools-and-services/data-services/hospital-episode-statistics>].
3. NHS Digital. Mental Health Services Data Set 2021 [Available from: <https://digital.nhs.uk/data-and-information/data-collections-and-data-sets/data-sets/mental-health-services-data-set>].
4. NHS Digital. Linked HES-ONS mortality data 2020 [Available from: <https://digital.nhs.uk/data-and-information/data-tools-and-services/data-services/linked-hes-ons-mortality-data>].
5. NHS Digital. Psychological Therapies: A guide to IAPT data and publications 2019 [Available from: <https://digital.nhs.uk/binaries/content/assets/website-assets/data-and-information/data-sets/iapt/guide-to-iapt-data-and-publications.pdf>].
6. Wittenberg R, Hu B, Barraza-Araiza L, Rehill A. Projections of older people with dementia and costs of dementia care in the United Kingdom, 2019–2040. London: London School of Economics. 2019.
7. Leung DK, Chan WC, Spector A, Wong GH. Prevalence of depression, anxiety, and apathy symptoms across dementia stages: A systematic review and meta-analysis. *International Journal of Geriatric Psychiatry*. 2021;36(9):1330-44.
8. Zenebe Y, Akele B, Necho M. Prevalence and determinants of depression among old age: a systematic review and meta-analysis. *Annals of General Psychiatry*. 2021;20(1):1-19.
9. Independent Mental Health Taskforce. The Five Year Forward View for Mental Health: NHS England; 2016 [Available from: <https://www.england.nhs.uk/wp-content/uploads/2016/02/Mental-Health-Taskforce-FYFV-final.pdf>].
10. NHS Digital. Psychological Therapies: Annual Report on the Use of IAPT Services, England 2015–16. 2016.
11. Department of Health. Talking Therapies: A Four Year Plan of Action. 2011.
12. Noone D, Stott J, Aguirre E, Llanfear K, Spector A. Meta-analysis of psychosocial interventions for people with dementia and anxiety or depression. *Aging & mental health*. 2019;23(10):1282-91.
